# Supplementary material
Source: PubMed Central journal article supplement (PMC7597308)
Supplement: TBSD_A_1832577_SM3685.pdf [file TBSD_A_1832577_SM3685.pdf]

## **Supplementary file**

### **Antiviral activity of traditional medicinal plants against SARS-CoV-2 and its cellular receptor**

**Vimal K Maurya<sup>†</sup>, Swatantra Kumar, Anil K Prasad, Madan LB Bhatt, Shailendra K Saxena<sup>†\*</sup>**

Department of Centre for Advanced Research (CFAR), Faculty of Medicine, King George's Medical University (KGMU), Lucknow 226003, India.

**Table S1:** Canonical SMILES used for the calculation of toxicity, pharmacokinetics and target prediction of active constituents.

| S.No | Name                | Canonical SMILES                                                                              |
|------|---------------------|-----------------------------------------------------------------------------------------------|
| 1.   | Amarogentin         | <chem>C=CC1C2CCOC(=O)C2=COC1OC3C(C(C(C(O3)CO)O)O)OC(=O)C4=C(C=C(C=C4O)O)C5=CC(=CC=C5)O</chem> |
| 2.   | Sawertiamarine      | <chem>C=CC1C(OC=C2C1(CCOC2=O)O)OC3C(C(C(C(O3)CO)O)O)O</chem>                                  |
| 3.   | $\alpha$ -amyrin    | <chem>CC(=O)OC1CCC2(C(C1(C)C)CCC3(C2CC=C4C3(CCC5(C4CC(CC5)(C)C)C)C)C)C</chem>                 |
| 4.   | $\beta$ -sitosterol | <chem>CCC(CCC(C)C1CCC2C1(CCC3C2CC=C4C3(CCC(C4)O)C)C)C(C)C</chem>                              |
| 5.   | Caesalpinins        | <chem>CC(=O)OC1CC(C2(C3CC4=C(C=CO4)C(=C)C3CCC2(C1(C)C)O)C)OC(=O)C</chem>                      |
| 6.   | Kutkin              | <chem>COC1=C(C=CC(=C1)C(=O)OC2C(C(C(C(O2)CO)O)O)O)OC(=O)C=CC3=CC=CC=C3.O.O</chem>             |
| 7.   | Vanillic acid       | <chem>COC1=C(C=CC(=C1)C(=O)O)O</chem>                                                         |
| 8.   | 6-gingerol          | <chem>CCCCC(CC(=O)CCC1=CC(=C(C=C1)O)OC)O</chem>                                               |
| 9.   | glycyrrhetic acid   | <chem>CC1(C2CCC3(C(C2(CCC1O)C)C(=O)C=C4C3(CCC5(C4CC(CC5)(C)C(=O)O)C)C)C)C</chem>              |
| 10.  | Piperine            | <chem>C1CCN(CC1)C(=O)C=CC=CC2=CC3=C(C=C2)OCO3</chem>                                          |
| 11.  | Magnoflorine        | <chem>C[N+]1(CCC2=CC(=C(C3=C2C1CC4=C3C(=C(C=C4)OC)O)O)OC)C</chem>                             |
| 12.  | alliin              | <chem>C=CCS(=O)CC(C(=O)O)N</chem>                                                             |
| 13.  | Allicin             | <chem>C=CCSS(=O)CC=C</chem>                                                                   |
| 14.  | N-acetylcysteine    | <chem>CC(=O)NC(CS)C(=O)O</chem>                                                               |
| 15.  | Thymoquinone        | <chem>CC1=CC(=O)C(=CC1=O)C(C)C</chem>                                                         |
| 16.  | Atropine            | <chem>CN1C2CCC1CC(C2)OC(=O)C(CO)C3=CC=CC=C3</chem>                                            |
| 17.  | Hyoscyamine         | <chem>CN1C2CCC1CC(C2)OC(=O)C(CO)C3=CC=CC=C3</chem>                                            |
| 18.  | Scopolamine         | <chem>CN1C2CC(CC1C3C2O3)OC(=O)C(CO)C4=CC=CC=C4</chem>                                         |
| 19.  | Belladonnine        | <chem>CN1C2CCC1CC(C2)OC(=O)C3CCC(C4=CC=CC=C4)(C5=CC=CC=C5)C(=O)OC6CC7CCC(C6)N7C</chem>        |
| 20.  | Eufoliatorin        | <chem>CC=C(C)C(=O)OC1CC2=C3C(CC(C3C4C1C(C(=O)O4)C)(C)O)OC2=O</chem>                           |
| 21.  | Eupafolin           | <chem>COC1=C(C2=C(C=C1O)OC(=CC2=O)C3=CC(=C(C=C3)O)O)O</chem>                                  |
| 22.  | Caffeic acid        | <chem>C1=CC(=C(C=C1C=CC(=O)O)O)O</chem>                                                       |
| 23.  | Amarogentin         | <chem>C1=CC(=CC=C1C(=O)OC2=CC3=C(C=C2)C=C(C=C3)C(=N)N)N=C(N)N</chem>                          |
| 24.  | Sawertiamarine      | <chem>CC(CS)C(=O)N1CCCC1C(=O)O</chem>                                                         |

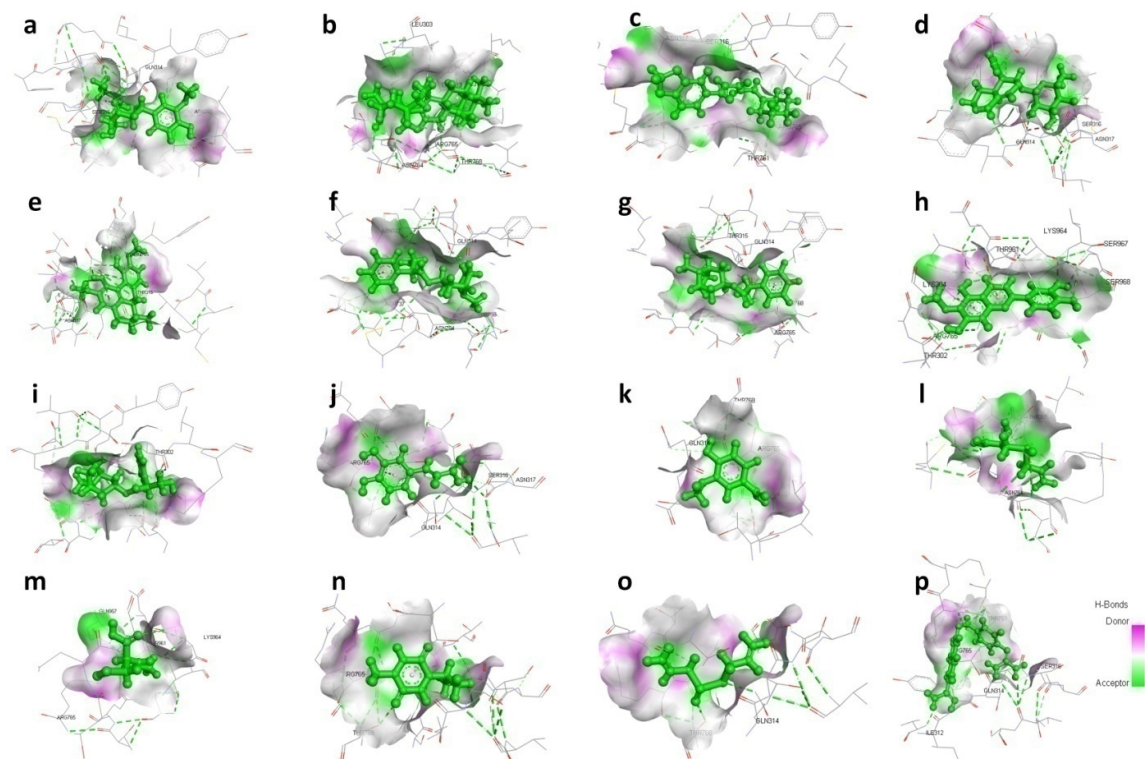

**Figure S1:** 3 D structure view of protein ligand interaction site. (a) 6-gingerol,(b) glycyrrhetic acid, (c) piperine, (d) sawertiamarine, (e) magnoflorine, (f) scopolamine, (g) atropine, (h) eupafolin, (i) hyoscyamine, (j) caffeic acid, (k) vanillic acid, (l) alliin, (m) n-acetylcysteine, (n) thymoquinone, (o) allicin, (p) nafamostat with spike glycoprotein of SARS-CoV-2.

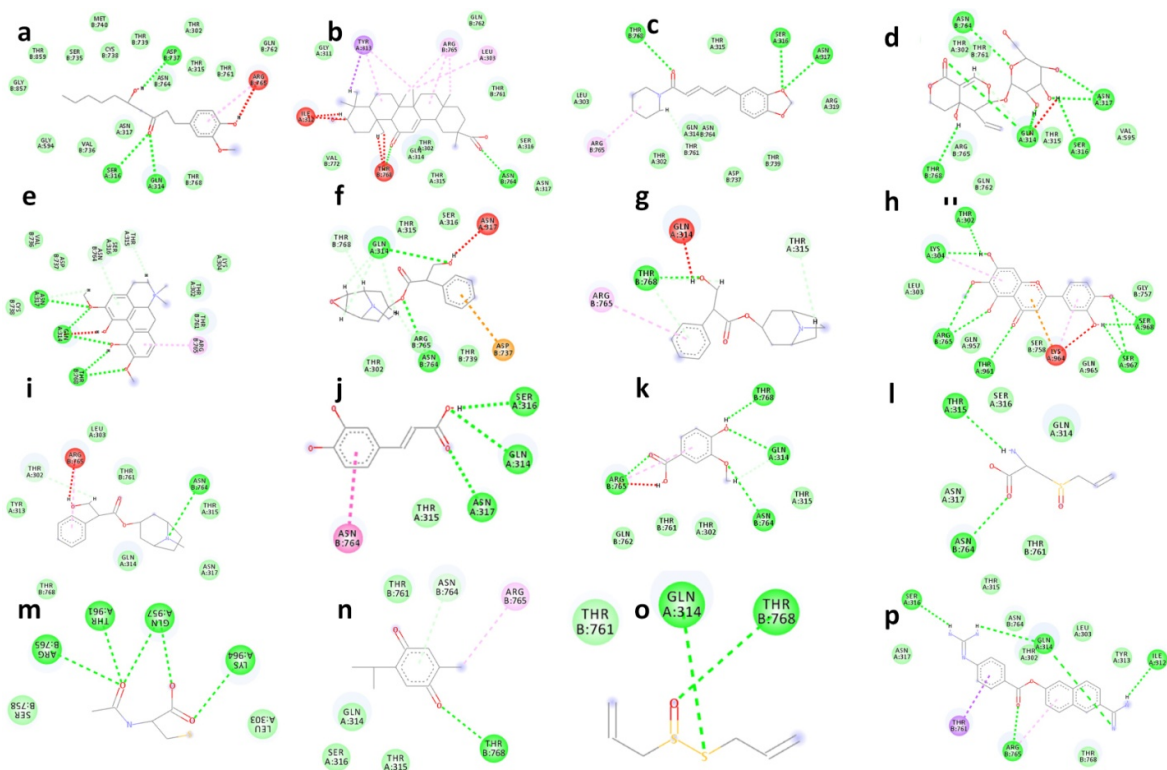

**Figure S2:** 2 D structure view of protein ligand interaction site (a) 6-gingerol,(b) glycyrrhetic acid, (c) piperine, (d) sawertiamarine, (e) magnoflorine, (f) scopolamine, (g) atropine, (h) eupafolin, and(i) hyoscyamine, (j) caffeic acid, (k) vanillic acid, (l) alliin, (m) n-acetylcysteine, (n) thymoquinone, (o) allicin, (p) nafamostat

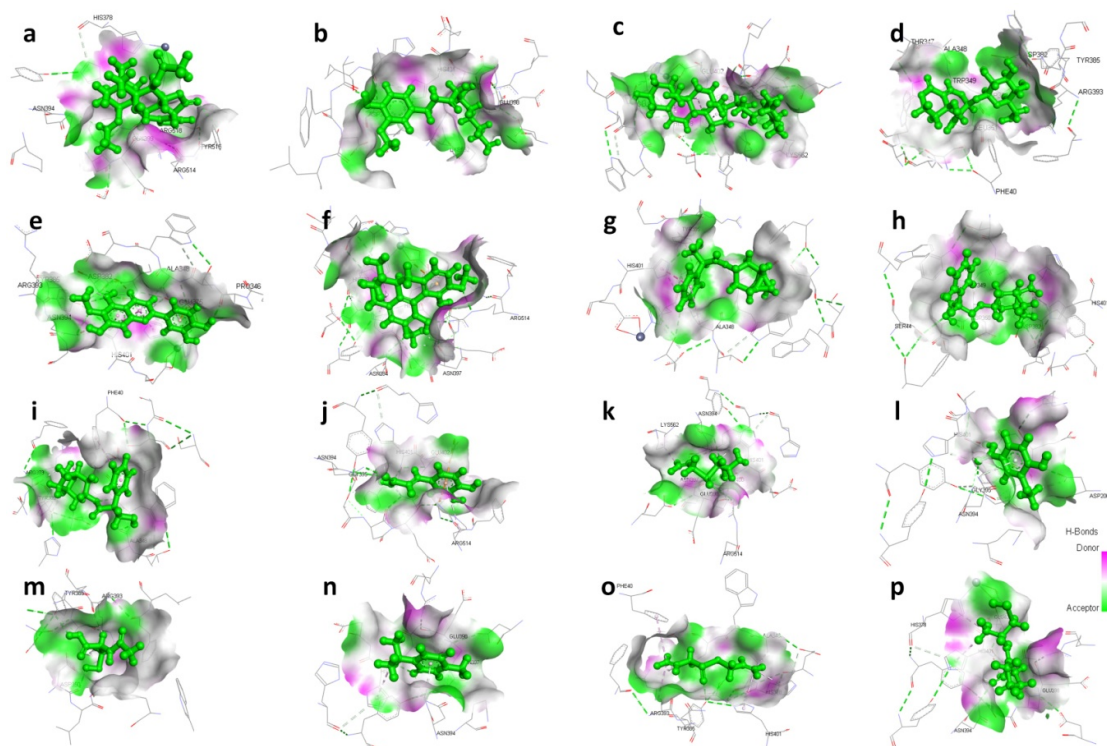

**Figure S3:** 3 D structure view of protein ligand interaction site. (a) caesalpinins, (b) 6-gingerol, (c)  $\beta$ -sitosterol, (d) sawertiamarine, (e) eupafolin, (f) magnoflorine, (g) scopolamine, (h) atropine, (i) hyoscyamine, (j) caffeic acid, (k) alliin, (l) vanillic acid, (m) n-acetylcysteine, (n) thymoquinone, (o) allicin, (p) captopril with ACE2.

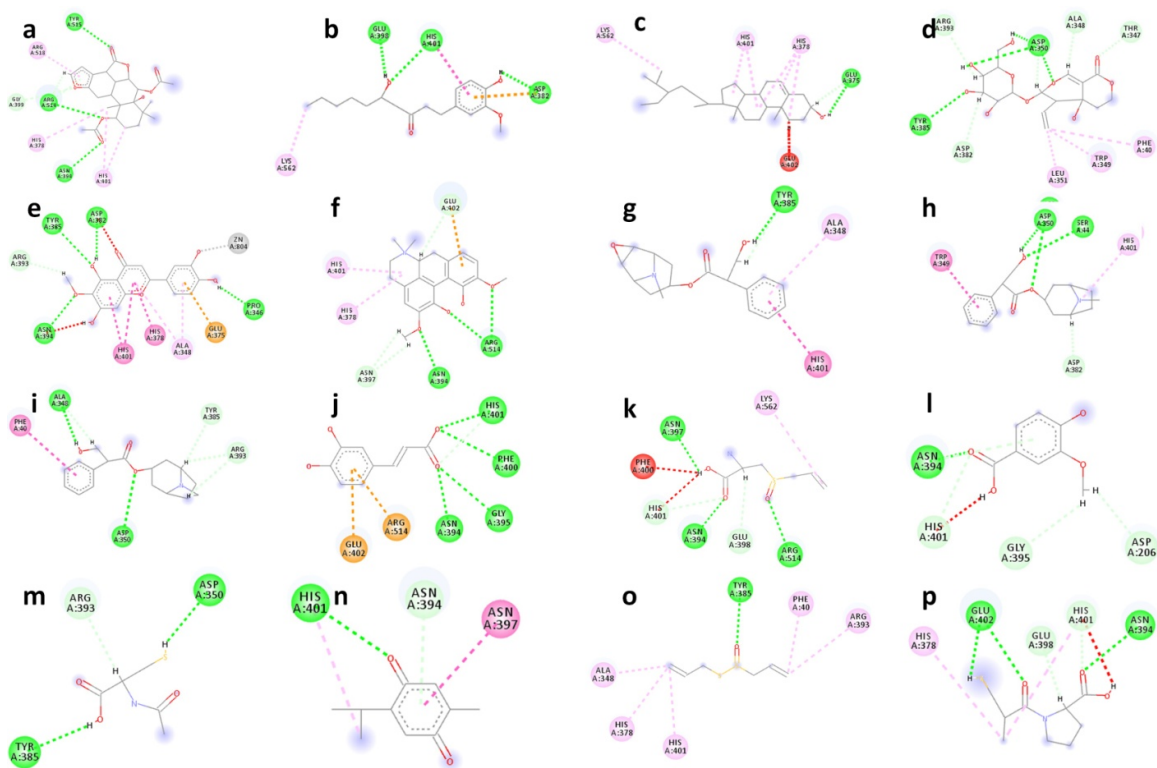

**Figure S4:** 2 D structure view of protein-ligand interaction site. (a) caesalpinins, (b) 6-gingerol, (c)  $\beta$ -sitosterol, (d) sawertiamarine, (e) eupafolin, (f) magnoflorine, (g) scopolamine, (h) atropine, (i) hyoscyamine, (j) caffeic acid, (k) alliin, (l) vanillic acid, (m) n-acetylcysteine, (n) thymoquinone, (o) allicin, (p) captopril with ACE2.

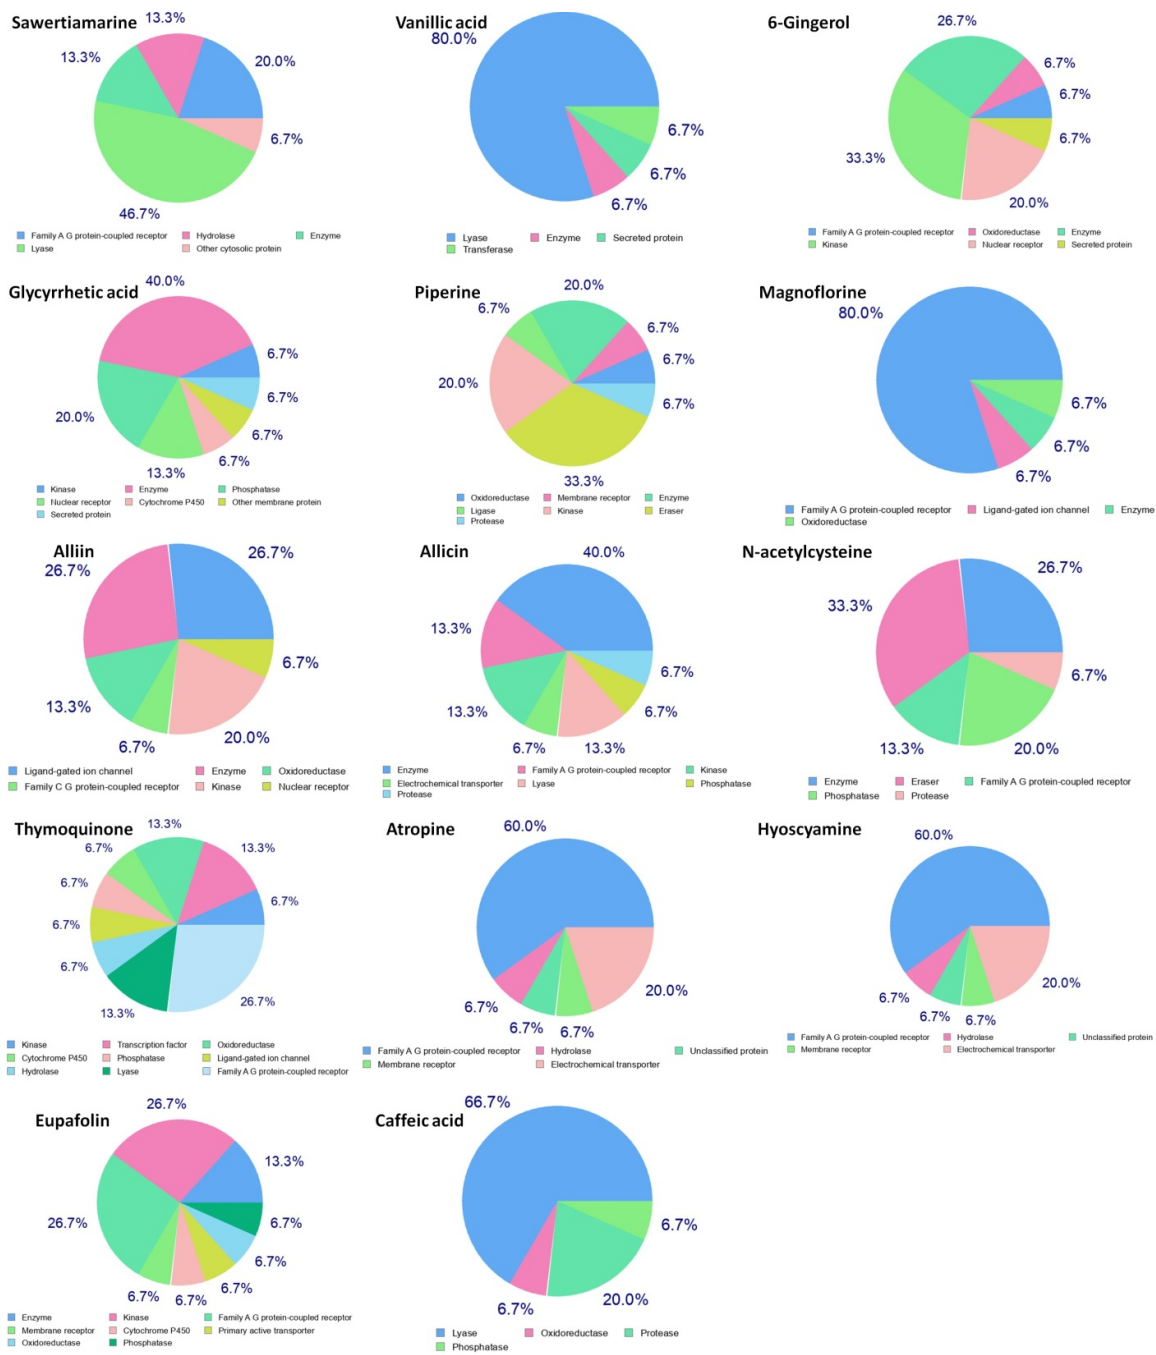

**Figure S5:** Target prediction analysis of sawertiamarine, vanillic acid, 6-gingerol, glycyrrhetic acid, piperine, magnoflorine, alliin, allicin, n-acetylcysteine, and thymoquinone, atropine, hyoscyamine, eupafolin, caffeic acid.
